# Supplementary material for: Polyphosphate Activates von Willebrand Factor Interaction with Glycoprotein Ib in the Absence of Factor VIII In Vitro
Source: MDPI journal article supplement (doi:10.3390/ijms232214118), 2022-11-15
Supplement: s1 [file s1]

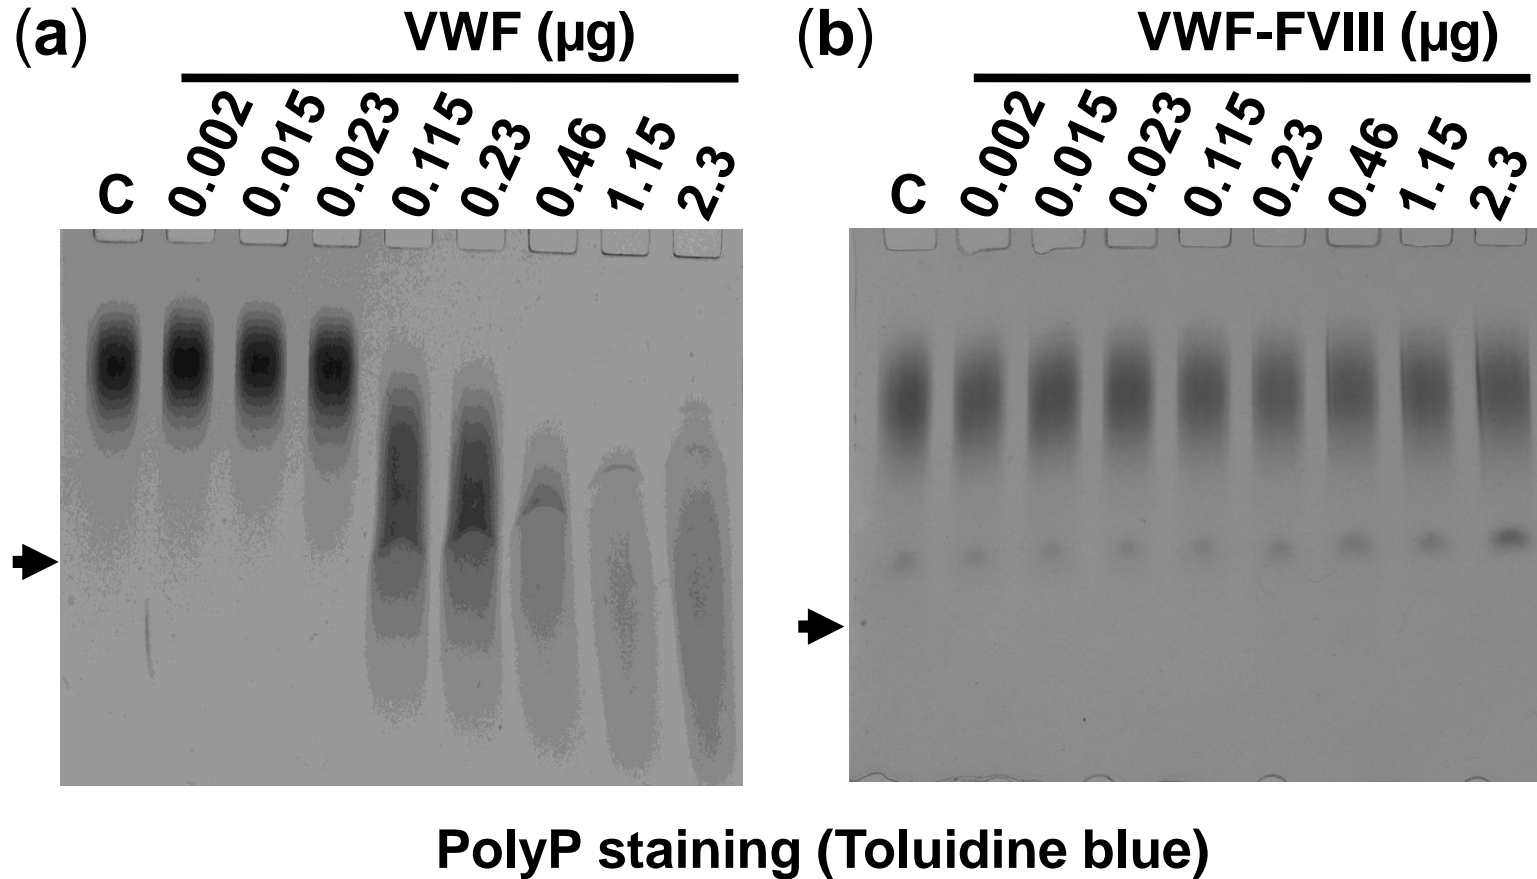

**Figure S1. Urea-polyacrylamide gel electrophoresis of polyphosphate and von Willebrand Factor, in the absence or presence of factor VIII.** Increasing amounts of von Willebrand Factor (Factor VIII-free) (a), or von Willebrand Factor co-purified with factor VIII (b), were incubated with 0.8 mM of isolated polyphosphate (polyP<sub>65</sub>) as described in Methods. Samples were loaded onto urea-polyacrylamide gels, separated by electrophoresis, and stained using polyphosphate-specific staining (toluidine blue). Arrows show the mobility of von Willebrand factor on the gels. Representative experiments are shown (n=3).

Figure S2.

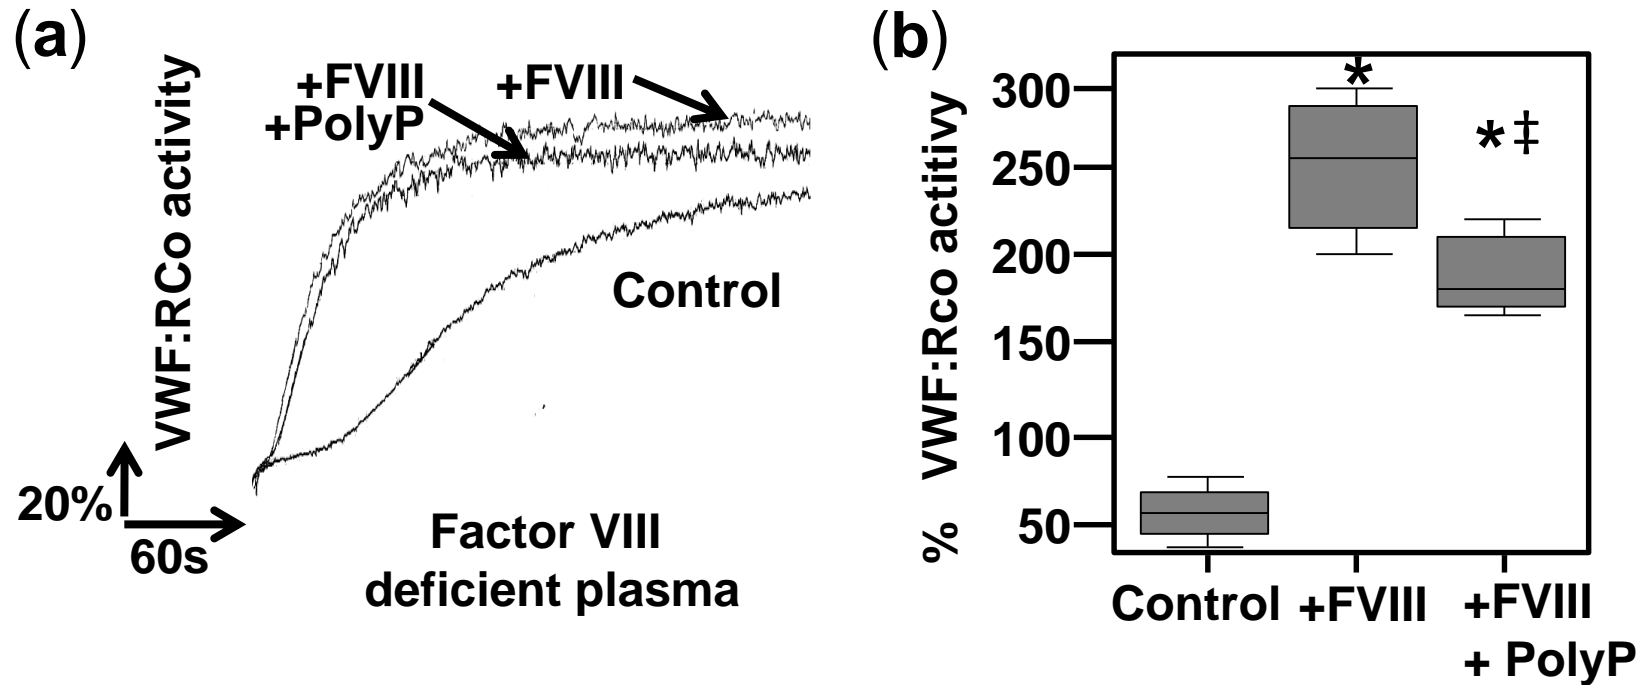

**Figure S2. PolyP competes with factor VIII in the activation of von Willebrand Factor ristocetin cofactor activity.** (a) Aggregation curves of fixed platelets in a ristocetin cofactor assay using factor VIII-deficient plasmas. Prior to the assay, 50  $\mu$ l of plasmas (diluted 1:2) were incubated with isolated Factor VIII (+Factor VIII), or Factor VIII plus polyphosphate (+Factor VIII +polyP) (0.65  $\mu$ g Factor VIII and 2.5  $\mu$ M polyP<sub>65</sub> were used). Control samples were assayed without Factor VIII or polyP<sub>65</sub> addition. Representative experiments are shown (n=3). (b) Quantification of von Willebrand Factor ristocetin cofactor activity of the result shown in panel (a) in three different plasmas. Results are presented in a box-and-whiskers plot. Asterisk indicates a statistical difference of  $p < .01$ , determined by Mann-Whitney test, compared to the "Control" measurements. Symbol "†" indicates a statistical difference of  $p < .01$ , determined by Mann-Whitney test, when Factor VIII is compared with Factor VIII plus polyphosphate. Measurements were performed using an automated aggregometer (Helena AggRAM).

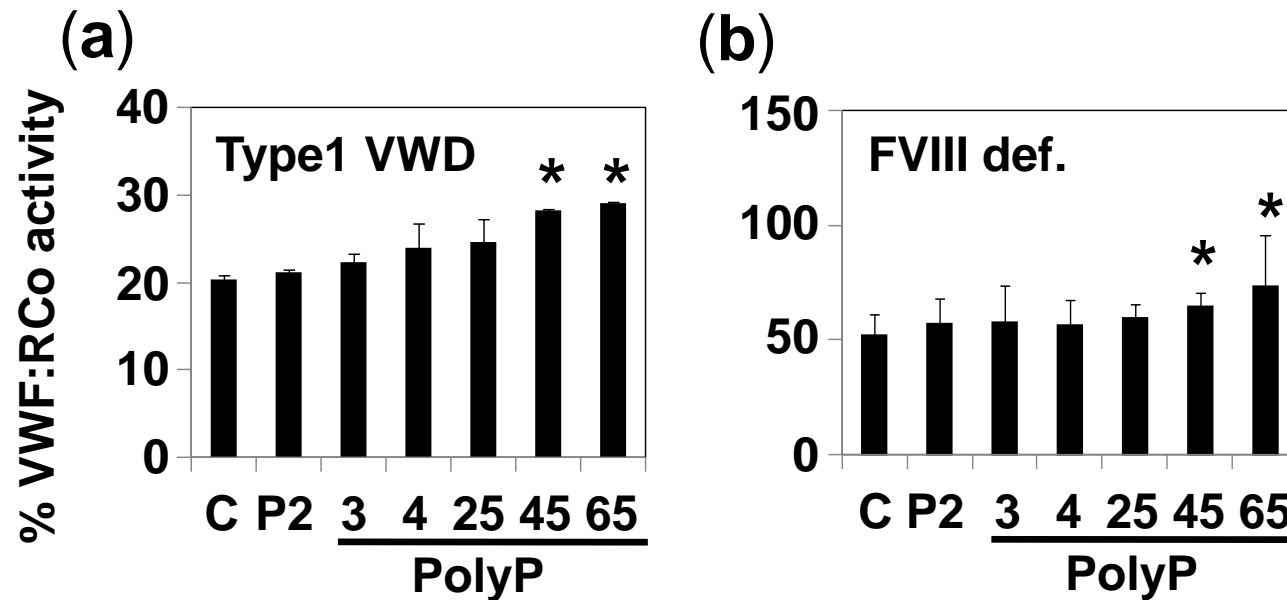

**Figure S3. PolyP size determines the activation of von Willebrand Factor ristocetin cofactor activity.** A ristocetin cofactor assay was performed using plasma from patients with (a) von Willebrand disease type 1, or (b) factor VIII-deficient plasmas, in the absence (control, "C") or in presence of 2.5  $\mu$ M of pyrophosphate (P2), tripolyphosphate (PolyP<sub>3</sub>), tetrapolyphosphate (PolyP<sub>4</sub>), PolyP<sub>25</sub>, PolyP<sub>45</sub>, or PolyP<sub>65</sub>. Results are expressed in percentages. Values represent the mean  $\pm$ S.E from three separate experiments. PolyP and PPi concentrations are expressed in terms of phosphate residues.
